# Supplementary material for: Combining evidence, biomedical literature and statistical dependence: new insights for functional annotation of gene sets
Source: PubMed Central journal article supplement (PMC1482722; doi:10.1186/1471-2105-7-241), 2006-05-04

**bcr-abl (A)**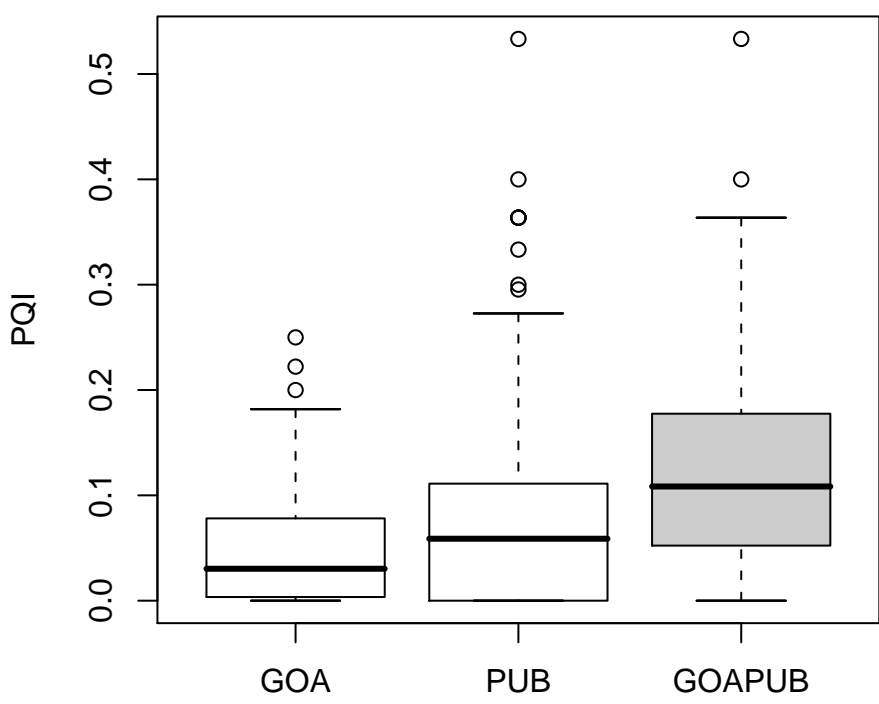**bcr-abl (B)**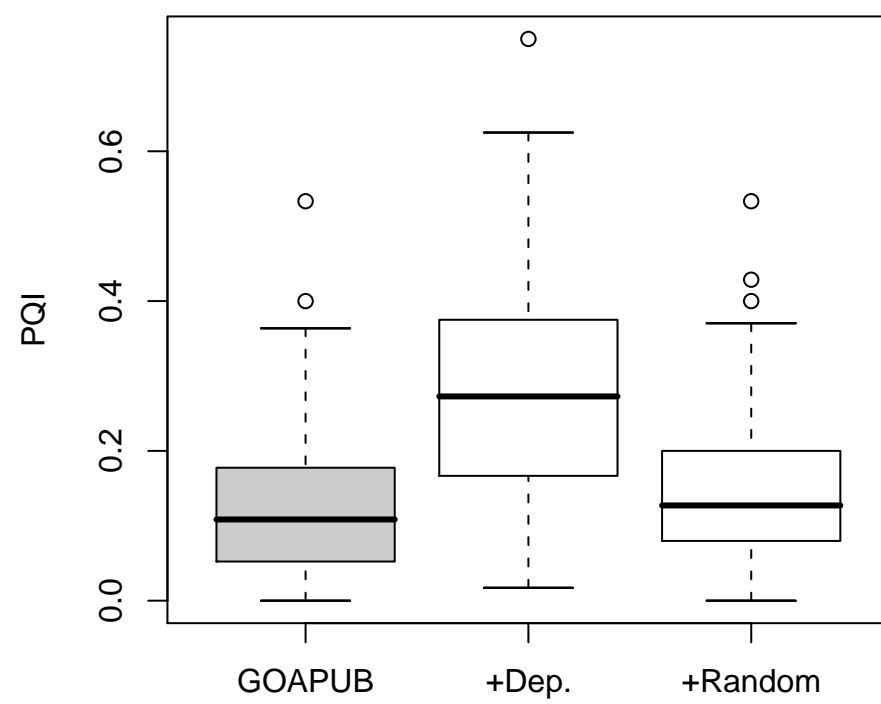**hyperdiploid (A)**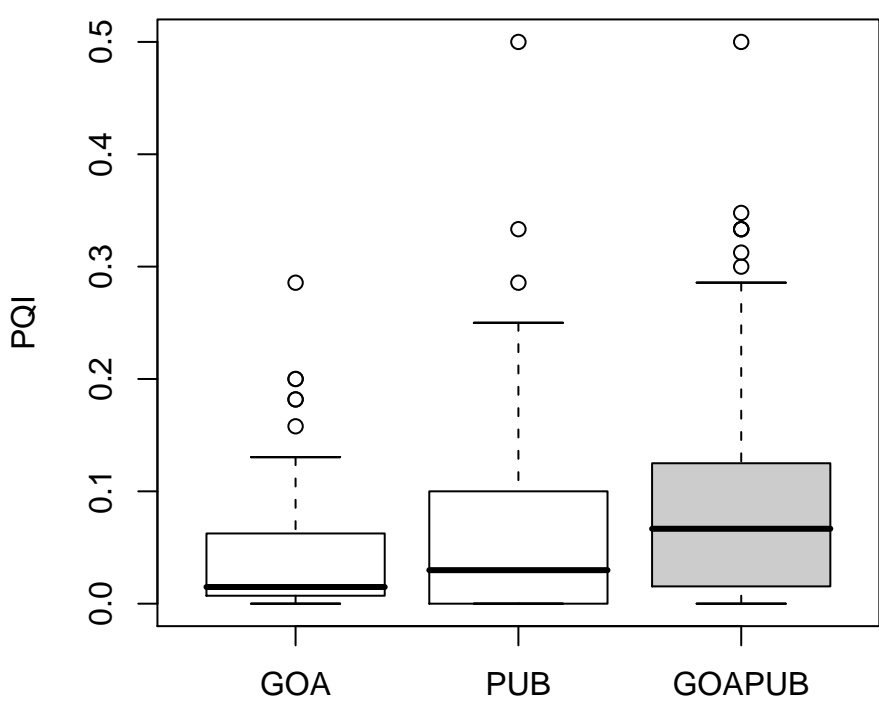**hyperdiploid (B)**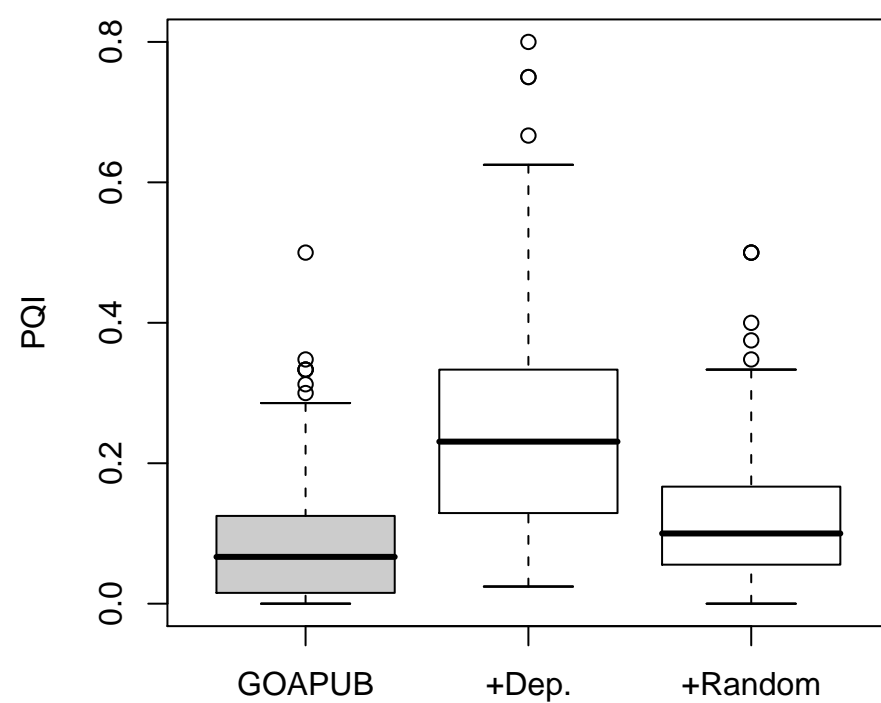**novel (A)**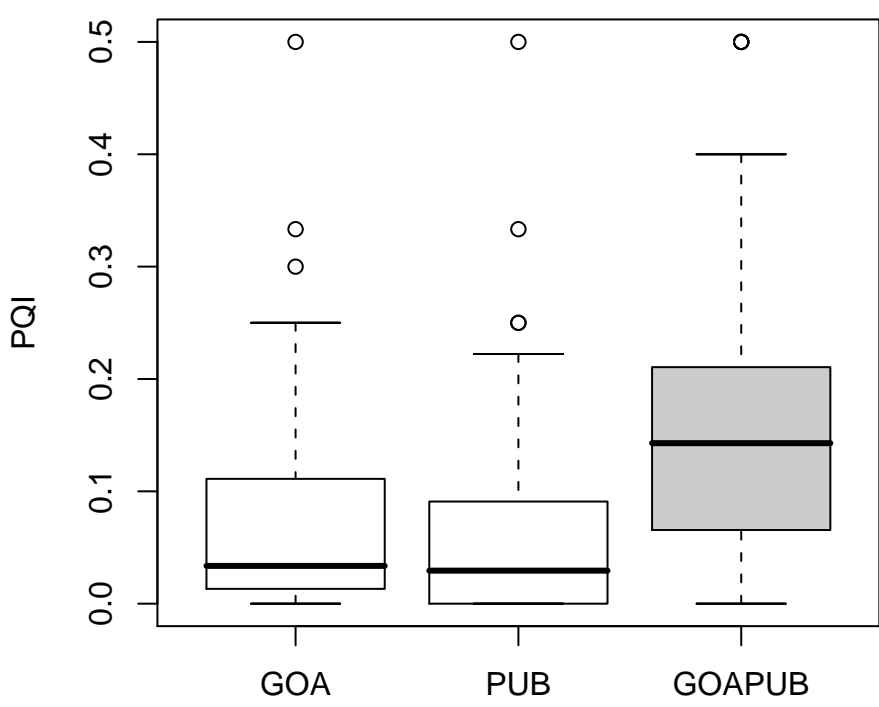**novel (B)**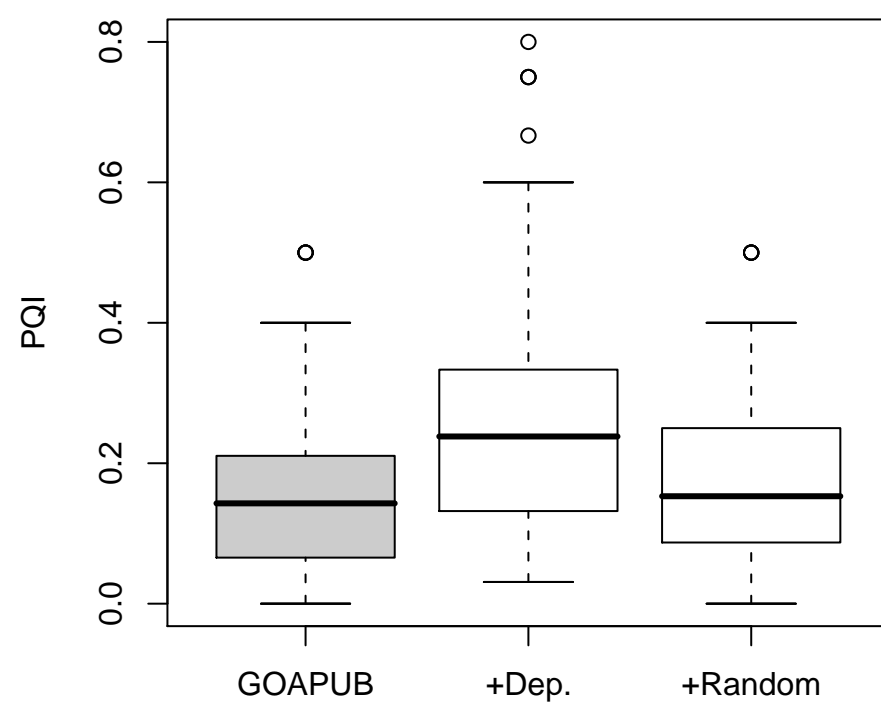**tel-aml1 (A)**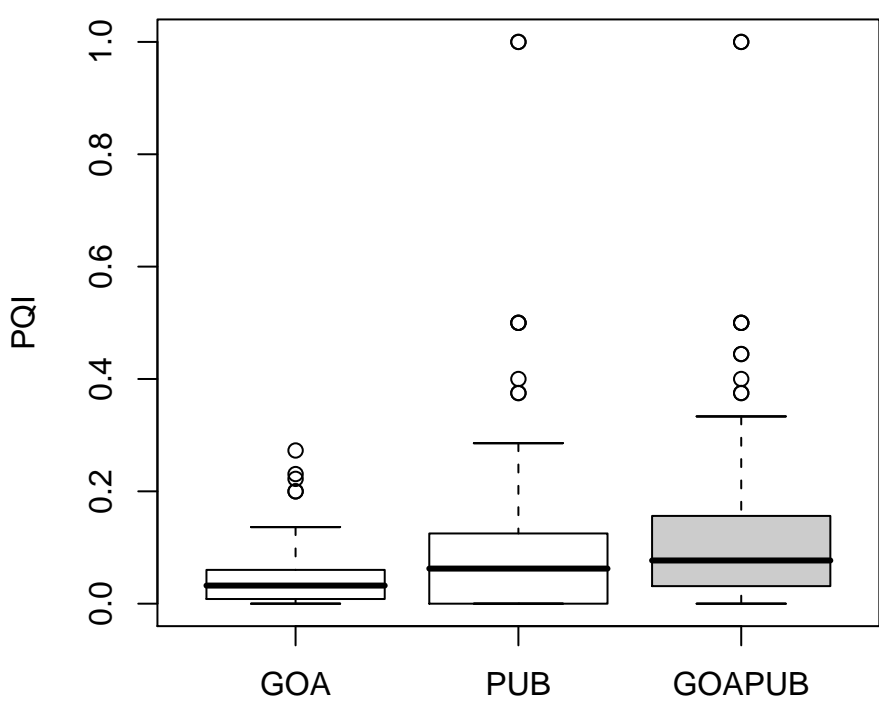**tel-aml1 (B)**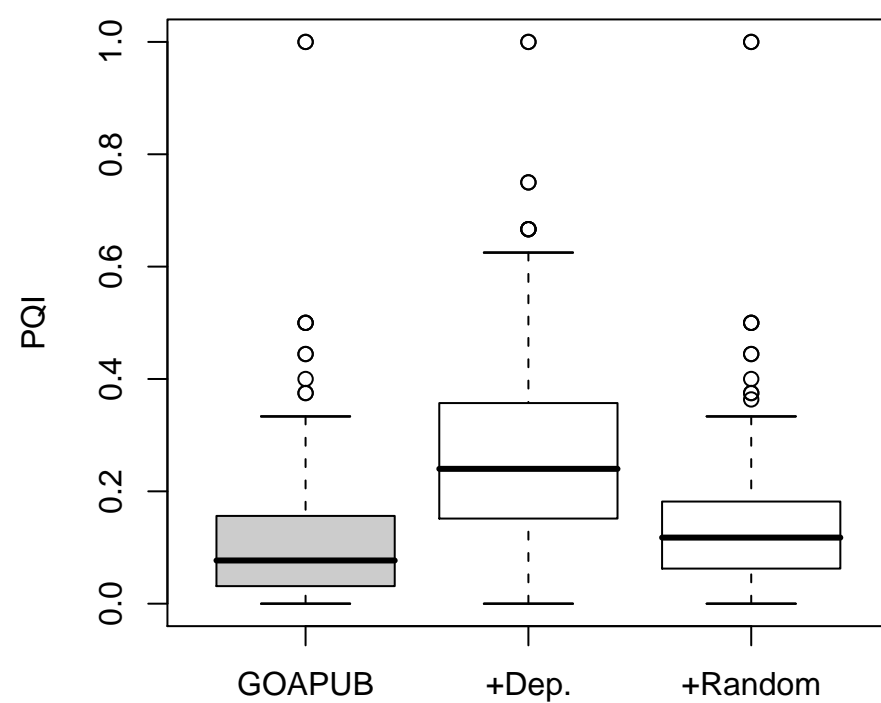

Supplement: 1471-2105-7-241-S4.pdf [file 1471-2105-7-241-S4.pdf]
