# Supplementary material for: Combining evidence, biomedical literature and statistical dependence: new insights for functional annotation of gene sets
Source: PubMed Central journal article supplement (PMC1482722; doi:10.1186/1471-2105-7-241), 2006-05-04

**Alzheimer (A)**

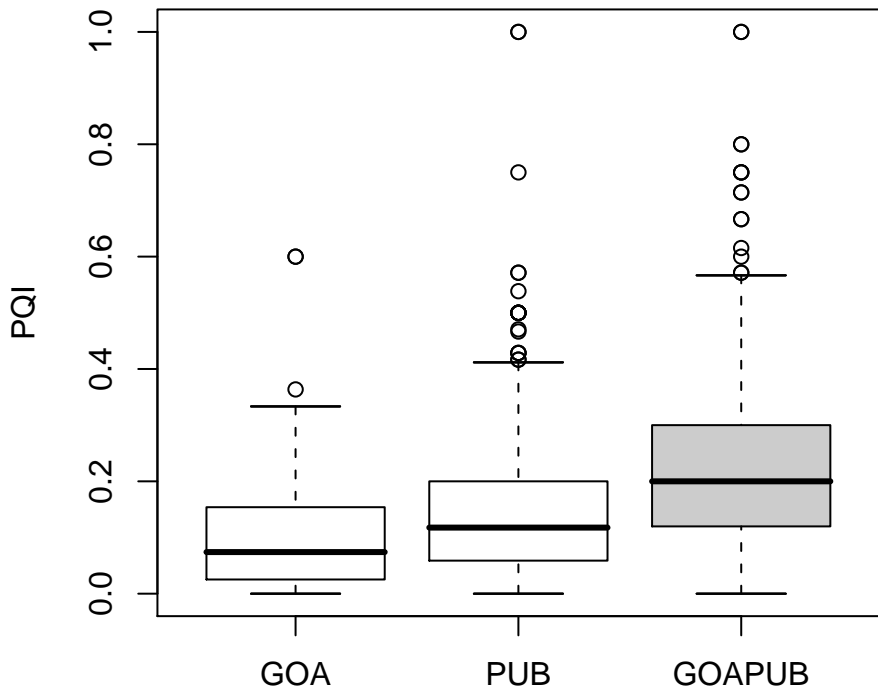

**Alzheimer (B)**

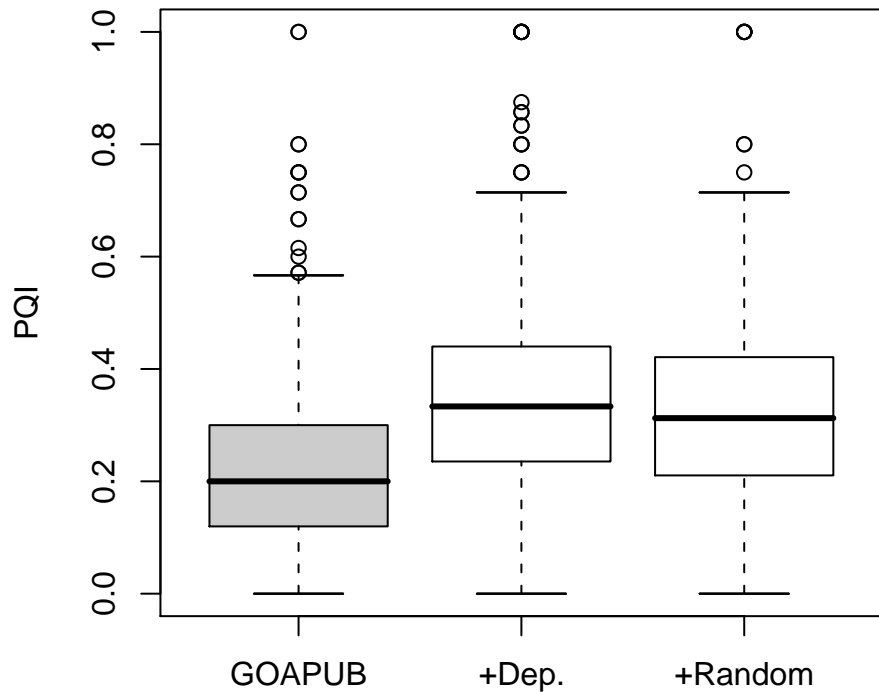

Supplement: 1471-2105-7-241-S8.pdf [file 1471-2105-7-241-S8.pdf]
